# Supplementary material for: Near-room temperature ferromagnetism and a tunable anomalous Hall effect in atomically thin Fe4CoGeTe2
Source: Royal Society of Chemistry journal article supplement (doi:10.1039/d3nr03594h), 2023-12-08
Supplement: d3nr03594h1.pdf [file d3nr03594h1.pdf]

## Nearly-room-temperature ferromagnetism and tunable anomalous

### Hall effect in atomically thin Fe<sub>4</sub>CoGeTe<sub>2</sub>

Shaohua Yan,<sup>†,1,2</sup> Hui-Hui He,<sup>†,1,2</sup> Yang Fu,<sup>†,1,2</sup> Ning-Ning Zhao,<sup>1,2</sup> Shangjie Tian,<sup>3,1,2</sup> Qiangwei Yin,<sup>1,2</sup> Fanyu Meng,<sup>1,2</sup> Xinyu Cao,<sup>4</sup> Le Wang,<sup>1,2</sup> Shanshan Chen,<sup>1,2</sup> Ki-Hoon Son,<sup>5</sup> Jun Woo Choi,<sup>5</sup> Hyjin Ryu,<sup>5</sup> Shouguo Wang,<sup>3</sup> Xiao Zhang,<sup>\*,4</sup> Kai Liu,<sup>\*,1,2</sup> and Hechang Lei<sup>\*,1,2</sup>

<sup>1</sup>Department of Physics and Beijing Key Laboratory of Optoelectronic Functional Materials & MicroNano Devices, Renmin University of China, Beijing 100872, China

<sup>2</sup>Key Laboratory of Quantum State Construction and Manipulation (Ministry of Education), Renmin University of China, Beijing 100872, China

<sup>3</sup>School of Materials Science and Engineering, Anhui University, Hefei 230601, China

<sup>4</sup>State Key Laboratory of Information Photonics and Optical Communications & School of Science, Beijing University of Posts and Telecommunications, Beijing 100876, China

<sup>5</sup>Center for Spintronics, Korea Institute of Science and Technology (KIST), Seoul 02792, Korea

### Supplemental Information

<sup>†</sup>These authors contributed equally to this work.

\*Correspondence and requests for materials should be addressed to

X. Z. ([zhangxiaobupt@bupt.edu.cn](mailto:zhangxiaobupt@bupt.edu.cn)), K. L. (email: [kliu@ruc.edu.cn](mailto:kliu@ruc.edu.cn)) or H. C. L. (email: [hlei@ruc.edu.cn](mailto:hlei@ruc.edu.cn))

## Supplementary Figures

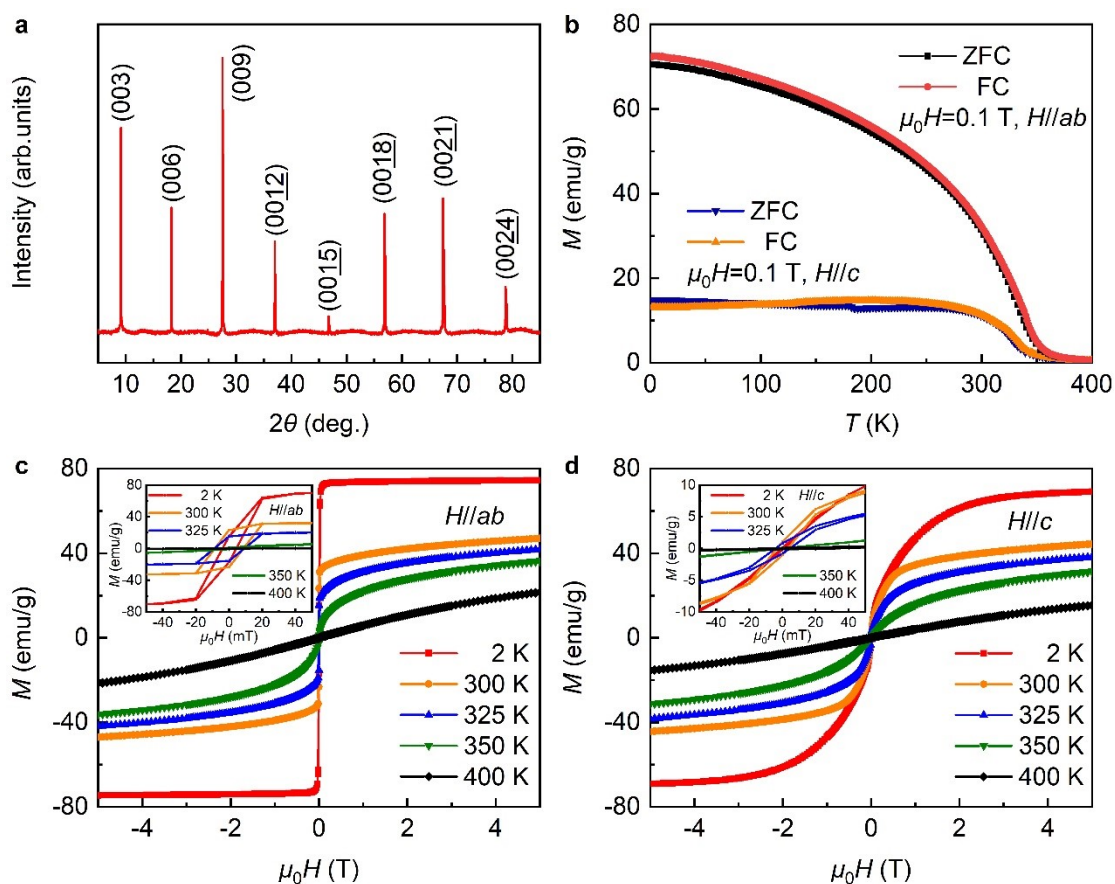

**Figure S1. Crystal structure and ferromagnetism of bulk F4CGT.** **a**, XRD pattern of a F4CGT crystal measured using a Bruker D8 X-ray machine with  $\text{Cu } K_\alpha$  radiation ( $\lambda = 0.15418$  nm) at room temperature. The crystal surface is parallel to the  $ab$  plane, consistent with the layered structure of F4CGT. **b**, Temperature dependence of magnetization  $M(T)$  for bulk F4CGT crystals at  $\mu_0 H = 0.1$  T with ZFC and FC modes when  $H//ab$  and  $H//c$ . The determined  $T_C$ s from the peak positions of  $dM/dT$  curve are about 341 K and 335 K for both field directions. **c** and **d**, Isothermal  $M(\mu_0 H)$  curves at various temperatures when  $H//ab$  and  $H//c$ . Inset in **c** and **d** shows the enlarged part of hysteresis loops at low-field region, respectively. It can be seen that the easy magnetization direction is along the  $ab$  plane for all of temperatures.

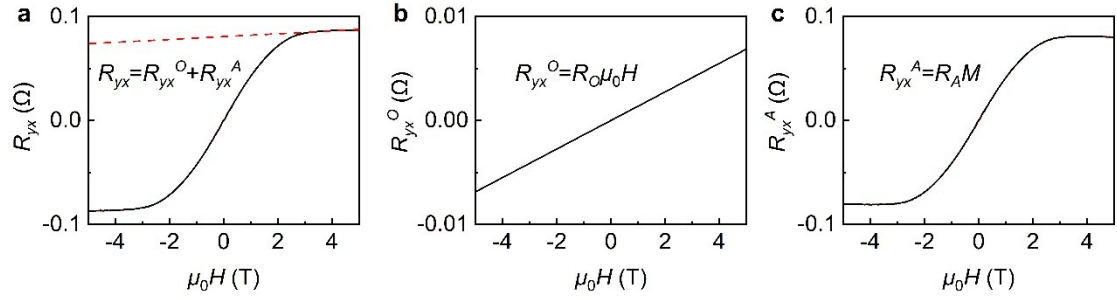

**Figure S2. Analysis of ordinary and anomalous Hall resistance.** **a**, The Hall resistance  $R_{yx}$  as a function of the magnetic field at 2 K for the sample with  $t = 220$  nm.  $R_0$  is derived by linear fitting of data of magnetic field from 3 T to 5 T. **b**, The ordinary Hall resistance  $R_{yx}^O$  as a function of the magnetic field. **c**, Field dependence of anomalous Hall resistance  $R_{yx}^A$ .

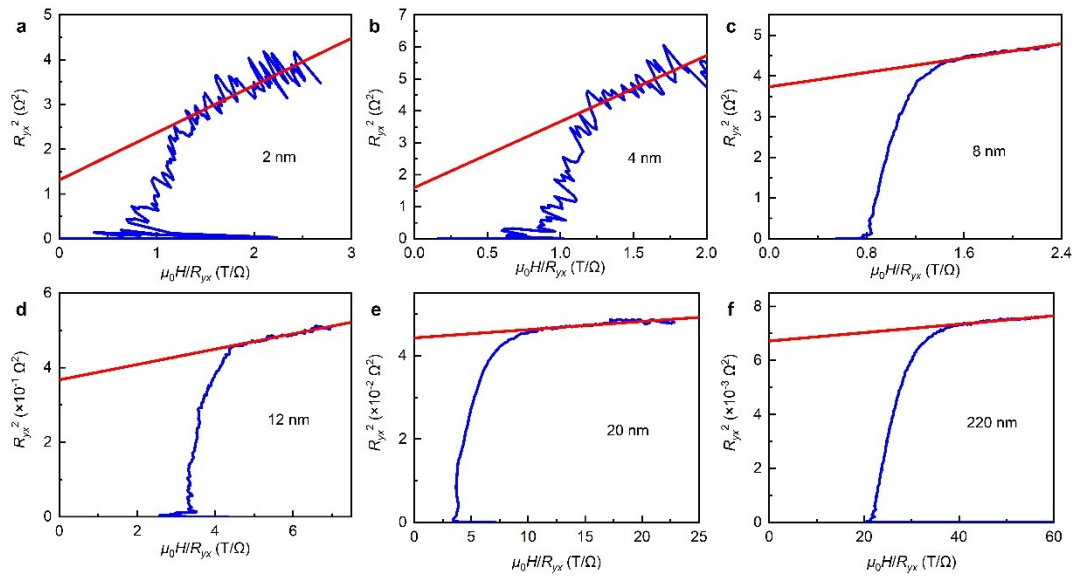

**Figure S3. The Arrott plots of F4CGT thin flakes at 2 K. a - f, the F4CGT think flakes with  $t = 2$  nm, 4 nm, 8 nm, 12 nm, 20 nm, and 220 nm. The lines are the linear fits at high-field region.**

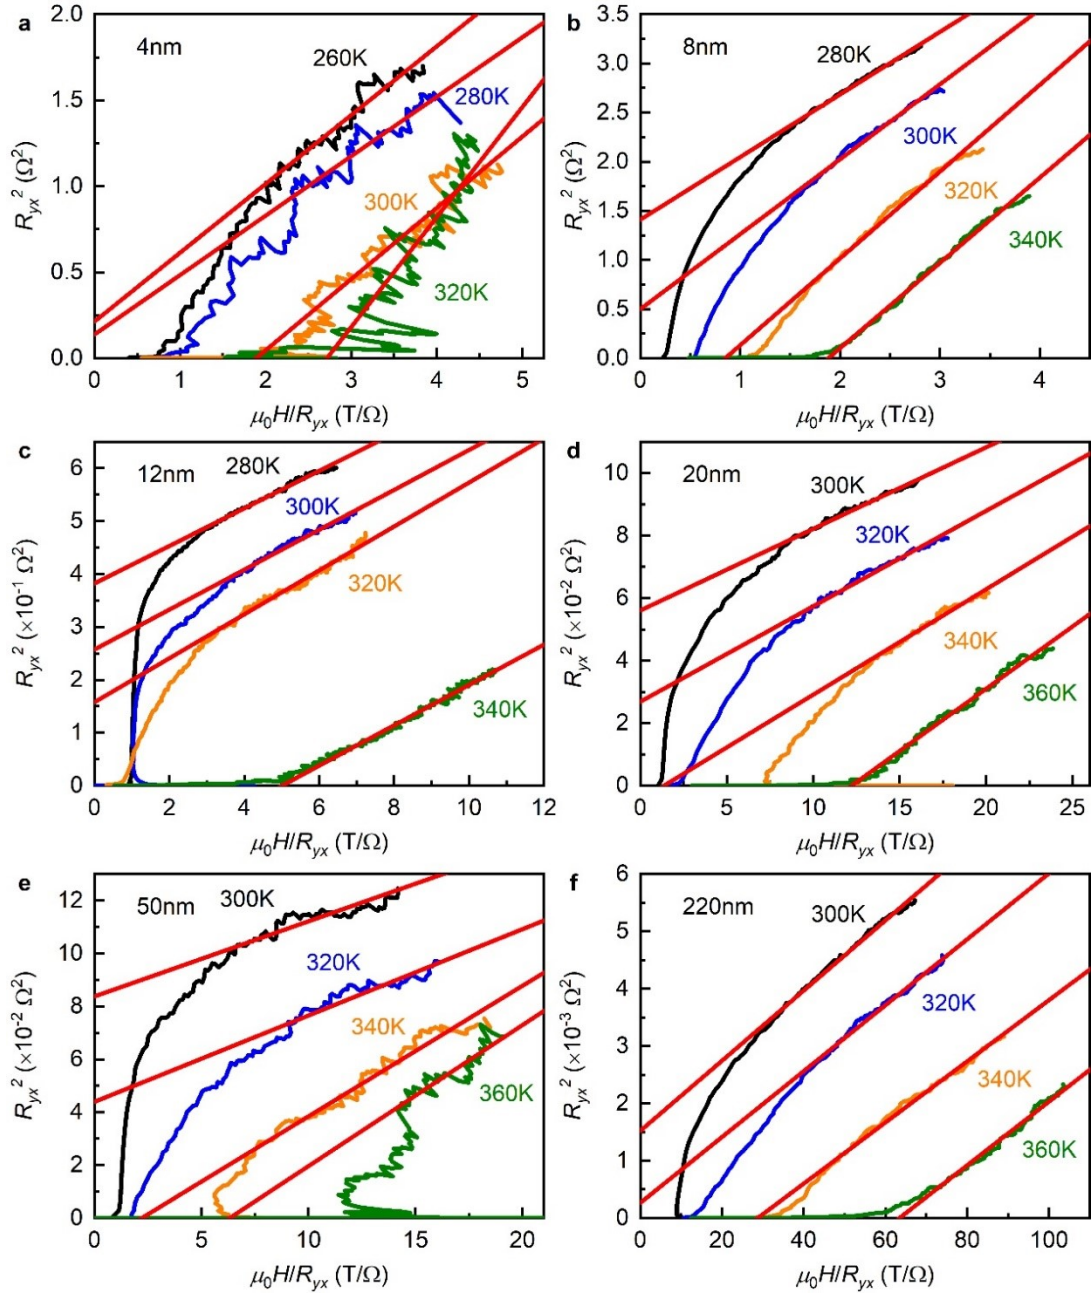

**Figure S4. Determining  $T_c$  by the analysis of Arrott plots.** a - f, Arrott plots of the Hall resistance data for samples with  $t = 4$  nm, 8 nm, 12 nm, 20 nm, 50 nm and 220 nm, respectively. Red lines are linear fits at high magnetic fields. The positive (negative) values of the intercepts to the  $R_{yx}^2$  axis indicate the ferromagnetic (paramagnetic) state.

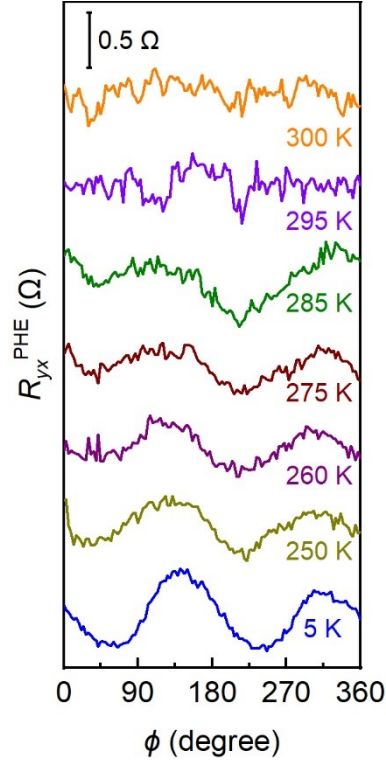

**Figure S5.** Angular dependence of planar Hall resistance  $R_{yx}^{\text{PHE}}(\phi)$  with in-plane field  $\mu_0 H = 5$  T for the bilayer F4CGT at different temperatures. The data is shifted for clarity.

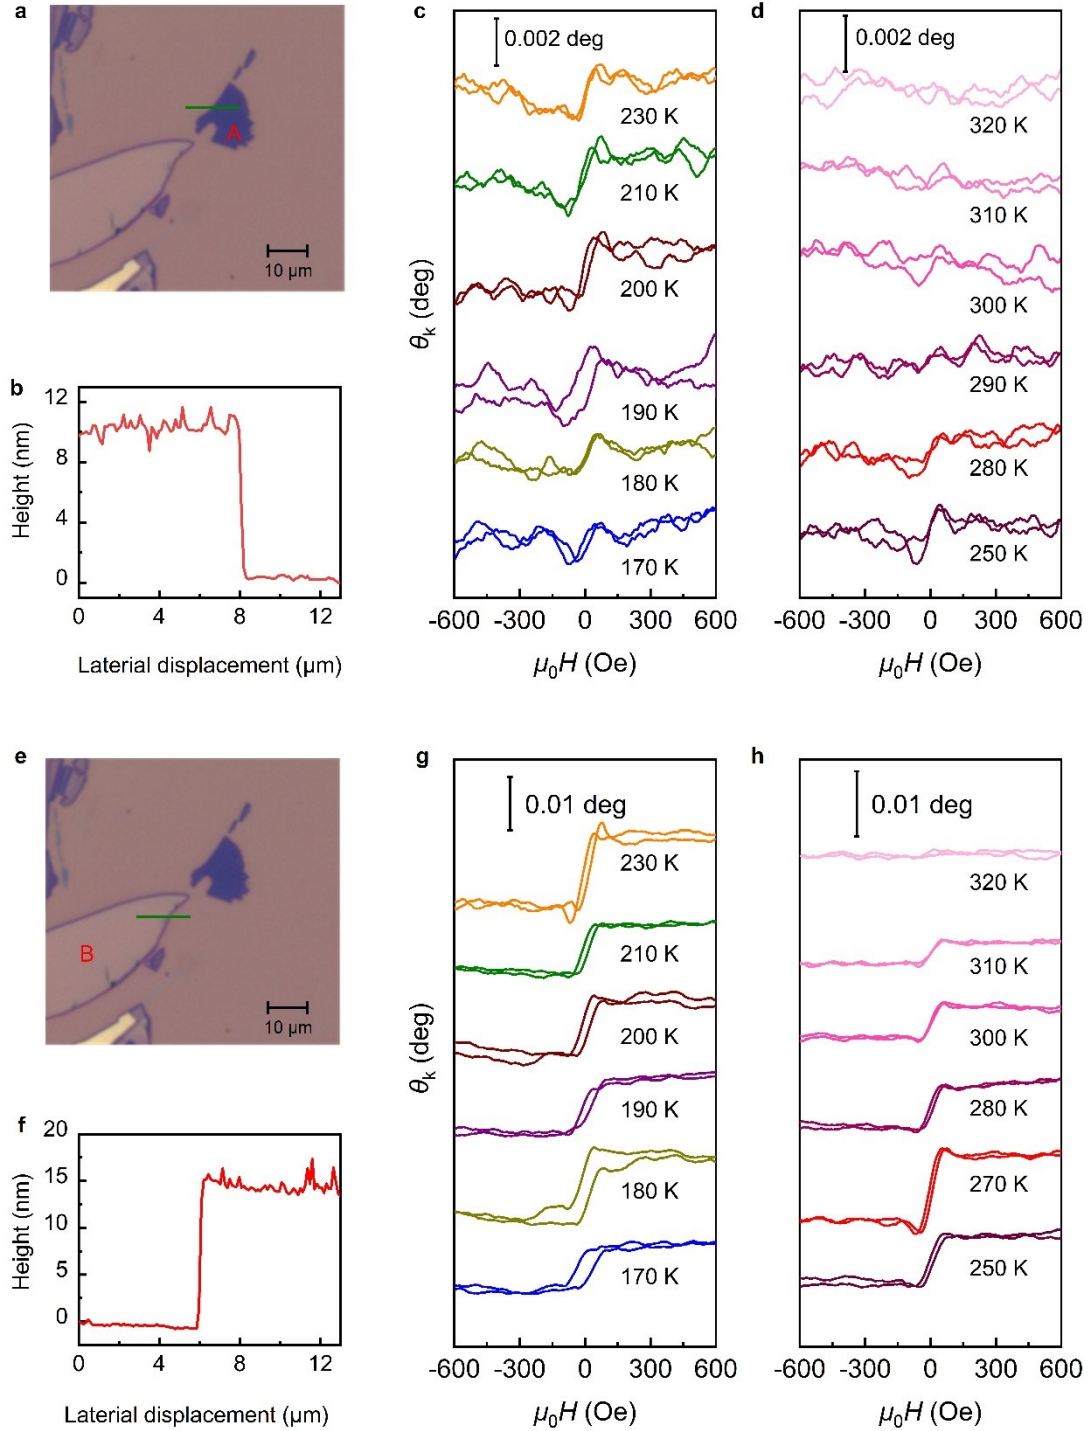

**Figure S6. MOKE measurements for F4CGT thin flakes.** **a**, Optical microscope image of a mechanically exfoliated F4CGT flake on a SiO<sub>2</sub>/Si substrate for  $t \sim 10$  nm. **b**, Height profile along the green lines in **a** measured by AFM. **c**, **d**, Kerr rotation ( $\theta_K$ ) loops as a function of in-plane magnetic field at various temperatures for F4CGT thin flake with  $t \sim 10$  nm (A sample in **a**). **e** – **h**, Corresponding results for F4CGT thin flake with  $t \sim 15$  nm (B sample in **e**).

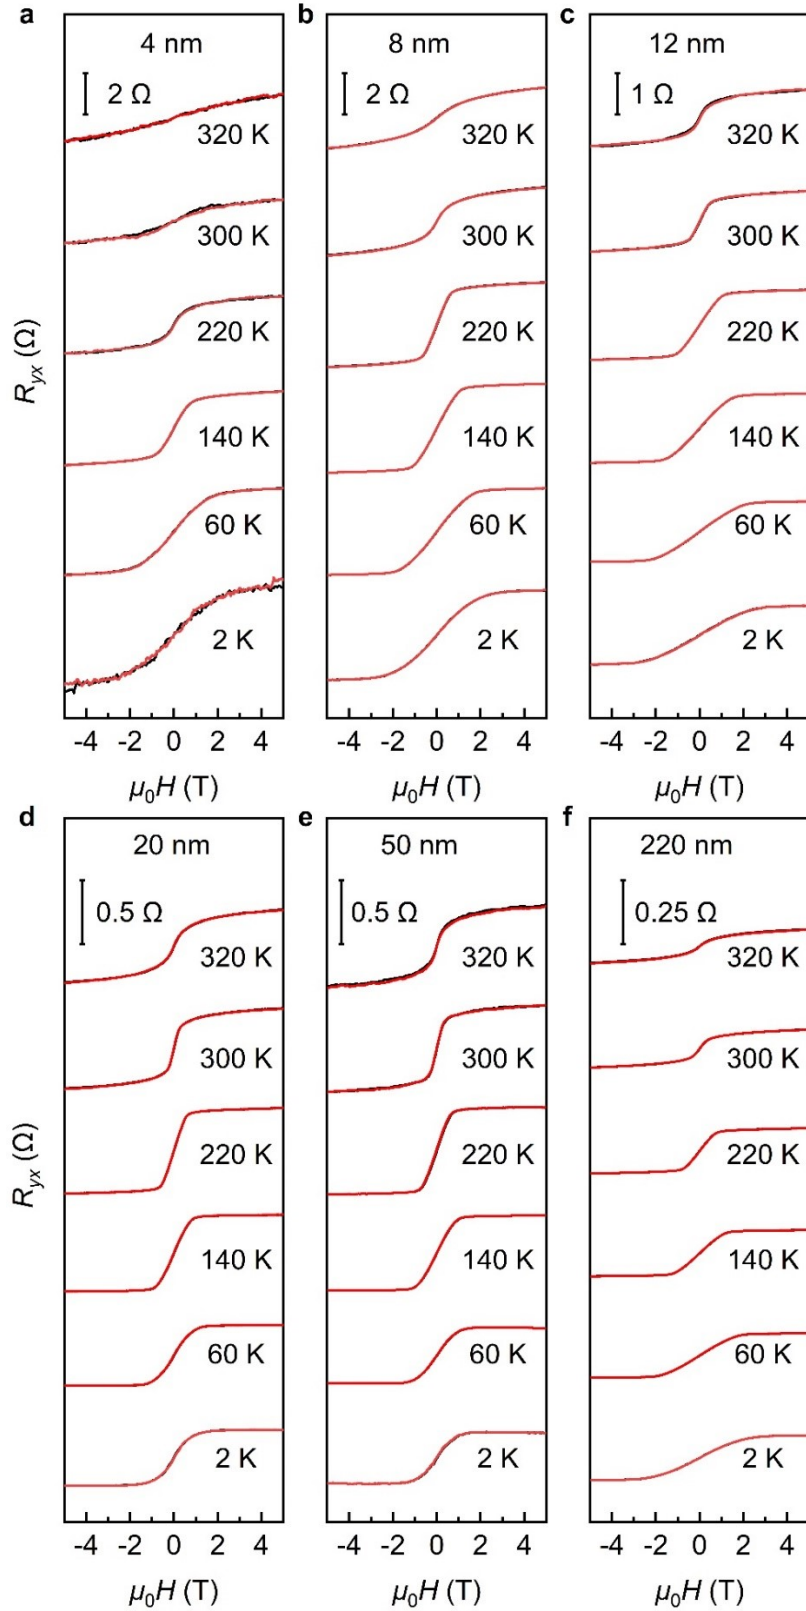

**Figure S7. Hall resistance of samples with different  $t$ .** a - f,  $R_{yx}$  as a function of magnetic field  $\mu_0H$  at various temperatures for the samples with  $t = 4$  nm, 8 nm, 12 nm, 20 nm, 50 nm and 220 nm. The red and black lines represent the  $R_{yx}(\mu_0H)$  measured when decreasing and increasing fields.

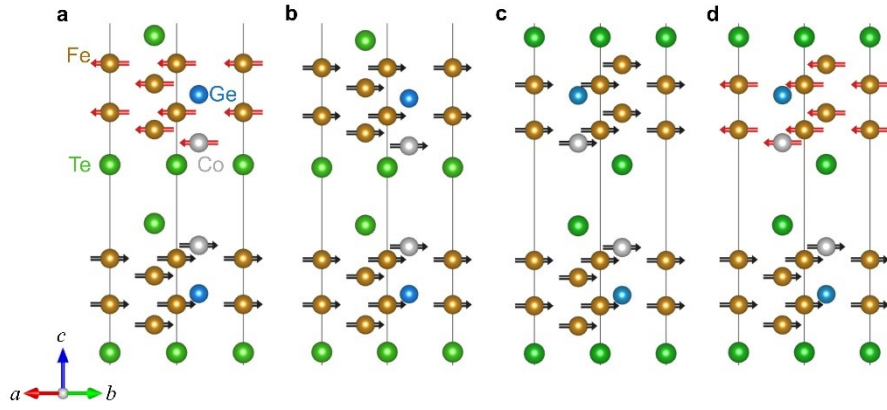

**Figure S8. Magnetic configurations in bilayer  $\text{Fe}_4\text{CoGeTe}_2$  (F4CGT).** **a**, AA-stacking bilayer F4CGT with inter-layer antiferromagnetic coupling and intra-layer ferromagnetic coupling. **b**, AA-stacking bilayer F4CGT with inter-layer and intra-layer ferromagnetic couplings. **c**, AB-stacking bilayer F4CGT with inter-layer and intra-layer ferromagnetic couplings. **d**, AB-stacking bilayer F4CGT with inter-layer antiferromagnetic coupling and intra-layer ferromagnetic coupling. The black and red arrows represent the different spin directions, respectively.

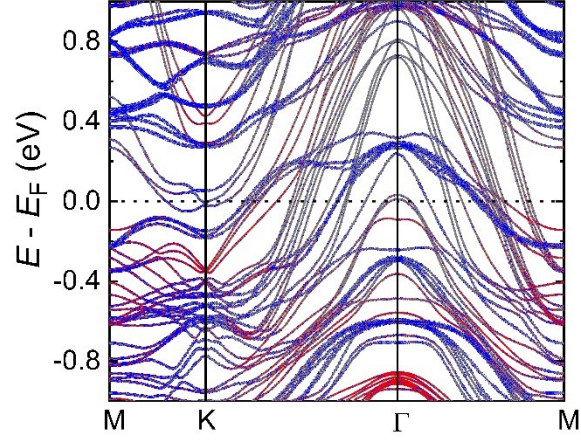

**Figure S9. Band structure of bulk F4CGT.** The band structure was calculated with the spin-orbit coupling for the ground states (i.e., the in-plane FM state) of ABC-stacking bulk F4CGT with Co occupying at disordered Fe(1) site. The points in red and blue represent to the contributions from Co and Fe atoms, respectively.

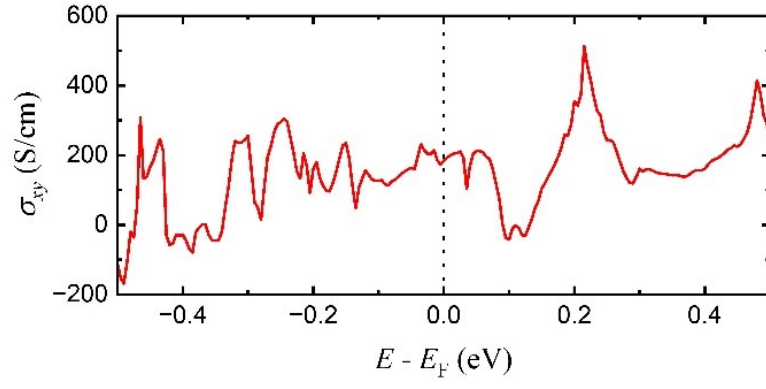

**Figure S10.** Calculated  $\sigma_{xy}$  of AB-stacking bilayer F4CGT as a function of  $E - E_F$ .

**Table S1.** The calculated relative energies of the NM, FM, and AFM states of bilayer F4CGT (as shown in Figure S8) with respect to the FM states in AA-stacking bilayer F4CGT. The energies are averaged to the ones per formula unit (f.u.).

| Energy/f.u. | NM       | AFM        | FM         |
|-------------|----------|------------|------------|
| AA-stacking | 1.379 eV | 2.155 meV  | 0          |
| AB-stacking | 1.396 eV | 37.135 meV | 35.835 meV |
